# Supplementary material for: An Intelligent Approach for Predicting Stock Market Movements in Emerging Markets Using Optimized Technical Indicators and Neural Networks
Source: publisher site journal article supplement (doi:10.1515/econ-2022-0073), 2024-01-01
Supplement: Supplementary file 1 [file Reviews.pdf]

# Reviews of ECONJOURNAL-D-23-00153R1

An intelligent approach for predicting stock market movements in emerging markets using optimized technical indicators and neural networks

## Round 1

### Reviewer 1

The title of the manuscript is "An intelligent approach for predicting stock market movements in emerging markets using optimized technical indicators and neural networks". In this context, I have some questions.

1. What kind of intelligent approach is used by the authors?
2. How technical indicators are optimized?
3. The latest research provided a variety of neural network models with variations in them. How your model is different from the other one?

There are some technical suggestions that must be incorporated:

1. The abstract is very superficial and needs to be rewritten and must include the problem definition, proposed potential methods, novelty, numerical findings, and comparisons with the other state-of-the-art methods.
2. The abstract mentioned that computational cost is reduced by 95%. What is the experimental base for this claim?
3. The author must present the novelty of their work. The author used a multi-layer perceptron for predictive analysis. However, the model is very conventional and the author(s) must project what new approaches or modifications are incorporated in the proposed work.
4. The author mentioned the statistical measures for feature selection. The literature has a wide range of feature selection methods. The author should explain the utilized (or proposed) feature selection method.
5. What train-test ratio is used for the model training and validation?
6. Comparative analysis is missing. The author must compare their work to validate the model performance.
7. Literature contextualization is poor and used references are outdated. The author must include the research papers that were published in the years 2022, 2023, and 2024 (forthcoming papers). Some of the suggested references are:  
"Stock Market Forecasting with Different Input Indicators using Machine Learning and Deep Learning Techniques: A Review"  
"Improving prediction efficiency of Chinese stock index futures intraday price by VIX-Lasso-GRU Model"  
"A right kind of wrong: European equity market forecasting with custom feature engineering and loss functions"  
"Two-Stage Hybrid Feature Selection Approach Using Levy's Flight Based Chicken Swarm Optimization for Stock Market Forecasting"
8. The language of the manuscript must be improved and free from grammatical errors.

## Round 2

### Editor

Dear Dr. Sagaceta-Mejia,

Thank you for the thorough revisions and efforts to address the comments and concerns raised by the reviewers. I have evaluated the updated manuscript and am pleased to inform you that your paper is now accepted for publication.

We appreciate your dedication to enhancing the quality of your work and contributing valuable research to the field.

Congratulations, and we look forward to publishing your paper.

Best regards,  
Omid M. Ardakani, Ph.D.  
Editor, Economics Journal
